# Supplementary material
Source: ML conference proceedings conference paper supplement (https://proceedings.neurips.cc/paper_files/paper/2023/hash/4e3378a8e80af4ffc456c4fa13d46550-Abstract.html)
Supplement: Supplementary file 1 [file 4e3378a8e80af4ffc456c4fa13d46550-Supplemental-Datasets_and_Benchmarks.pdf]

## 458 Checklist

459 The checklist follows the references. Please read the checklist guidelines carefully for information on  
460 how to answer these questions. For each question, change the default **[TODO]** to **[Yes]**, **[No]**, or  
461 **[N/A]**. You are strongly encouraged to include a **justification to your answer**, either by referencing  
462 the appropriate section of your paper or providing a brief inline description. For example:

- 463 • Did you include the license to the code and datasets? **[Yes]** See Appendix B.

464 Please do not modify the questions and only use the provided macros for your answers. Note that the  
465 Checklist section does not count towards the page limit. In your paper, please delete this instructions  
466 block and only keep the Checklist section heading above along with the questions/answers below.

467 1. For all authors...

- 468 (a) Do the main claims made in the abstract and introduction accurately reflect the paper's  
469 contributions and scope? **[Yes]**
- 470 (b) Did you describe the limitations of your work? **[Yes]** See Section 8 of main text.
- 471 (c) Did you discuss any potential negative societal impacts of your work? **[No]** In Section  
472 1 of the main text, we describe the negative social impacts that modern vision models  
473 can have. Our paper hopes to shine light on these discrepancies, and explore what  
474 factors cause them to arise.
- 475 (d) Have you read the ethics review guidelines and ensured that your paper conforms to  
476 them? **[Yes]**

477 2. If you are including theoretical results...

- 478 (a) Did you state the full set of assumptions of all theoretical results? **[N/A]**
- 479 (b) Did you include complete proofs of all theoretical results? **[N/A]**

480 3. If you ran experiments (e.g. for benchmarks)...

- 481 (a) Did you include the code, data, and instructions needed to reproduce the main experi-  
482 mental results (either in the supplemental material or as a URL)? **[Yes]** See the data  
483 card in Appendix B. Github link contains the code and data for reproducibility.
- 484 (b) Did you specify all the training details (e.g., data splits, hyperparameters, how they  
485 were chosen)? **[N/A]**
- 486 (c) Did you report error bars (e.g., with respect to the random seed after running experi-  
487 ments multiple times)? **[No]**
- 488 (d) Did you include the total amount of compute and the type of resources used (e.g., type  
489 of GPUs, internal cluster, or cloud provider)? **[No]** We evaluated pre-trained models.  
490 Computation usage is minimal.

491 4. If you are using existing assets (e.g., code, data, models) or curating/releasing new assets...

- 492 (a) If your work uses existing assets, did you cite the creators? **[Yes]**
- 493 (b) Did you mention the license of the assets? **[Yes]** See the data card in Appendix B.
- 494 (c) Did you include any new assets either in the supplemental material or as a URL? **[Yes]**  
495 See the data card in Appendix B.
- 496 (d) Did you discuss whether and how consent was obtained from people whose data you're  
497 using/curating? **[No]** We provided additional annotations to the DollarStreet data. We  
498 did not collect any new photos.
- 499 (e) Did you discuss whether the data you are using/curating contains personally identifiable  
500 information or offensive content? **[No]**

501 5. If you used crowdsourcing or conducted research with human subjects...

- 502 (a) Did you include the full text of instructions given to participants and screenshots, if  
503 applicable? **[Yes]** See Appendix A.1.3.

- 504 (b) Did you describe any potential participant risks, with links to Institutional Review  
505 Board (IRB) approvals, if applicable? [No]
- 506 (c) Did you include the estimated hourly wage paid to participants and the total amount  
507 spent on participant compensation? [No]

508 **A Appendix**

509 **A.1 Annotating Dollar Street with factor labels**

510 **A.1.1 DollarStreet Statistics**

| Region       | Income Level |        |      |
|--------------|--------------|--------|------|
|              | low          | medium | high |
| Africa       | 2141         | 1443   | 280  |
| Asia         | 1362         | 8673   | 1424 |
| Europe       | 0            | 1443   | 1455 |
| The Americas | 339          | 2093   | 1223 |

Table 3: Number of images for each region, income level pair in Dollar Street.

511 Table 3 shows the number of images in Dollar Street for each income and region pairing. We  
512 observe the distribution across images and regions is far from uniform, implying region and income  
513 distributions skew of counts are entangled. Consequently, we present both region and income  
514 comparisons where appropriate in our analysis.

515 **A.1.2 Prototypical Image Selection**

516 We define prototypical images for each class as those correctly classified by ResNet-50 model with  
517 the highest confidence. We use a ResNet-50 model pre-trained on ImageNet21k from [Ridnik et al.](#)  
518 [\[2021\]](#). We select the ImageNet classes that overlap with Dollar Street labels, using the mapping as  
519 defined in [\[Goyal et al., 2022\]](#). We use a soft-max over the sub-section of ImageNet classes that are  
520 in the mapping. We take the top predictions and confidence for these ImageNet classes and use the  
521 defined mapping from IN21k to Dollar Street in order to make DollarStreet class predictions. Out of  
522 the box, the model does not perform well on DollarStreet. Running a full pass over the dataset with  
523 Batch Norm in train mode, without any updates to the model weights, helps with the distribution shift  
524 from ImageNet to DollarStreet images, meaning overall accuracy is higher.

525 We select the three images that the model predicts successfully with the highest confidence. If such  
526 images do not exist, prototypical images are hand-selected. Table 4 shows the prototypical images  
527 used for five classes.

528 **A.1.3 Annotation Setup**

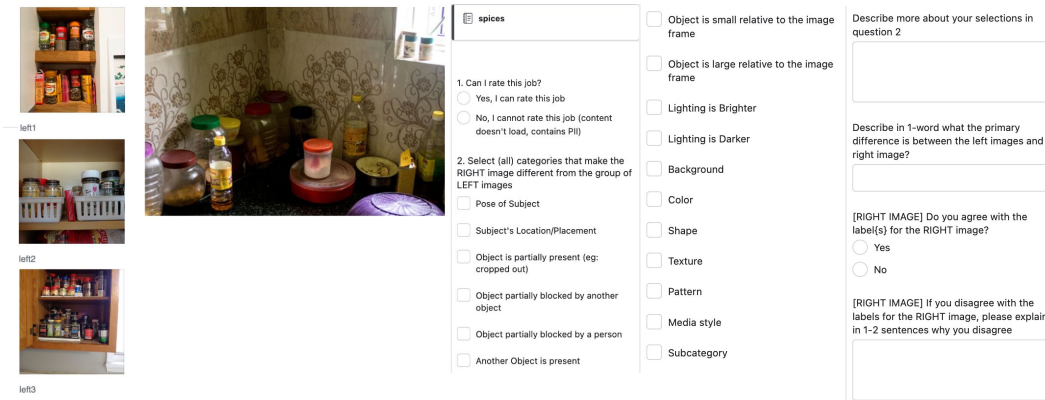

Figure 8: Example annotation task.

| Class           | Prototypical Images                                                               |                                                                                   |                                                                                     |
|-----------------|-----------------------------------------------------------------------------------|-----------------------------------------------------------------------------------|-------------------------------------------------------------------------------------|
| grains          |  |  |  |
| plates          |  |  |  |
| power outlets   |  |  |  |
| cleaning floors |  |  |  |
| toothbrushes    |  |  |  |

Table 4: Prototypical images used for five classes.

529 Figure 8 shows an example of the annotation task. Annotators select the factors distinguishing  
530 each image among sixteen factors such as pose, various forms of occlusion, size, style, type or  
531 breed. Annotators can select any number of distinctive factors for each image. We source 10  
532 annotators through a third party vendor from South East Asia. In addition, we ask annotators to  
533 provide text descriptions to account for factors outside the sixteen we provide. We trained annotators  
534 with examples so that they were familiar with the task before annotating the target images. We  
535 had intermediate QA from the third party vendor monitoring annotations for quality. We also ask  
536 annotators whether they agree with the original class label for each image.

#### 537 A.1.4 Label Agreement Annotation Setup

| Country              | Number of annotators |
|----------------------|----------------------|
| India                | 8                    |
| Nigeria              | 9                    |
| Brazil               | 13                   |
| United Arab Emirates | 6                    |
| United States        | 8                    |

Table 5: Annotator breakdown for label agreement task.

538 For our follow up annotations about label agreement, we sourced 44 annotators from 5 different  
539 countries, with the full demographics shown in Table 5. We asked one annotator per country about  
540 each image in question. In Table 9, we show example images from the three most disputed classes,  
541 along with alternative labels suggested by annotators. In Table 6, we show the classes with the highest  
542 and lowest levels of disagreement among annotators.

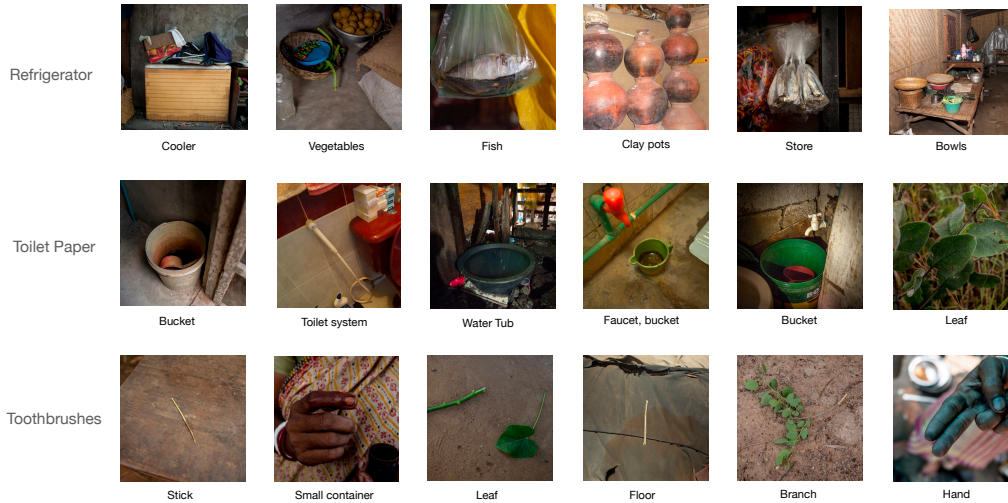

Figure 9: Randomly sampled example images and alternative labels given for the three classes with most disagreement. The original class label is shown on the left, and the alternative label given by the annotator shown below each image.

| class         | % disagreement | class           | % disagreement |
|---------------|----------------|-----------------|----------------|
| toilet paper  | 88.4           | medication      | 10.0           |
| refrigerators | 83.5           | fruit trees     | 11.8           |
| toothbrushes  | 79.3           | plates of food  | 12.3           |
| sofas         | 77.8           | trash           | 14.3           |
| diapers       | 72.0           | cleaning floors | 14.5           |
| armchairs     | 70.6           | ceilings        | 15.0           |
| showers       | 66.3           | homes           | 15.0           |
| kitchen sinks | 64.5           | books           | 15.0           |
| wall clocks   | 63.2           | cooking pots    | 19.8           |
| radios        | 60.4           | wheel barrows   | 20.0           |

Table 6: Top ten classes with the highest percentage of annotators who *disagreed* (left) and *agreed* (right) with the original class label

543 **A.2 How do objects vary across incomes and geographies?**

544 We show the most dissimilar classes across incomes and regions by comparing the Jensen-Shannon  
 545 Distance of the factor annotation distributions in Tables 7 and 8.

| class                | income bucket | differentiating factors          |
|----------------------|---------------|----------------------------------|
| roofs                | low vs. high  | subcategory, pose, smaller       |
| ceilings             | low vs. high  | pose, subcategory, texture       |
| diapers              | low vs. high  | color, shape, texture            |
| radios               | low vs. high  | color, shape, subcategory        |
| floors               | low vs. high  | texture, pose, pattern           |
| sofas                | low vs. high  | color, texture, multiple objects |
| kitchen sinks        | low vs. high  | shape, pose, background          |
| toilet paper         | low vs. high  | color, pose, background          |
| wardrobes            | low vs. high  | background, pattern, color       |
| mosquito protections | low vs. high  | color, subcategory, pattern      |

Table 7: Classes with most stark differences in factor distributions by Jensen-Shannon Distance (JSD) across incomes.

| class     | regions                 | distinctive factors                |
|-----------|-------------------------|------------------------------------|
| chickens  | Asia vs. Europe         | partial view, color, shape         |
| chickens  | Europe vs. Africa       | pose, partial view, color          |
| diapers   | The Americas vs. Africa | pose, color, partial view          |
| pet foods | Asia vs. The Americas   | color, texture, pattern            |
| pet foods | Asia vs. Europe         | pattern, subcategory, color        |
| ceilings  | Europe vs. Africa       | pose, subcategory, texture         |
| roofs     | Europe vs. Africa       | subcategory, pose, texture         |
| car keys  | Asia vs. Europe         | pattern, partial view, subcategory |
| make up   | Europe vs. Africa       | background, subcategory, pattern   |
| goats     | Asia vs. Africa         | pattern, color, subcategory        |

Table 8: Classes with most stark differences in factor distributions by Jensen-Shannon Distance (JSD) across regions

546 We show the most similar classes across incomes and regions using the same procedure of comparing  
547 Jensen-Shannon Distance of the factor annotation distributions in Tables 9 and 10.

| class                   | income buckets  | distinctive factors                 |
|-------------------------|-----------------|-------------------------------------|
| vegetable plots         | low vs. high    | multiple objects, background, color |
| phones                  | medium vs. high | background, pose, multiple objects  |
| pens                    | medium vs. high | color, background, pattern          |
| bikes                   | low vs. high    | background, subcategory, smaller    |
| armchairs               | medium vs. high | color, background, pose             |
| latest furniture bought | medium vs. high | subcategory, background, color      |
| child rooms             | medium vs. high | pose, pattern, color                |
| wall clocks             | medium vs. high | color, pose, shape                  |
| cooking utensils        | medium vs. high | pose, shape, pattern                |

Table 9: Classes most similar in factor distributions by Jensen Shannon Distance across incomes

| class             | regions                 | distinctive factors                   |
|-------------------|-------------------------|---------------------------------------|
| vegetable plots   | The Americas vs. Africa | pose, background, pattern             |
| phones            | Asia vs. Europe         | pose, background, color               |
| pens              | Europe vs. Africa       | pose, color, pattern                  |
| wheel barrows     | Europe vs. The Americas | color, pose, background               |
| ceilings          | Asia vs. Africa         | subcategory, pattern, texture         |
| pets              | Asia vs. Europe         | background, pattern, subcategory      |
| stoves            | Asia vs. Africa         | subcategory, color, pattern           |
| menstruation pads | Asia vs. The Americas   | pose, subcategory, pattern            |
| tv's              | Europe vs. The Americas | partial view, subcategory, background |
| everyday shoes    | Europe vs. The Americas | color, partial view, shape            |

Table 10: Classes most similar in factor distributions by Jensen Shannon Distance (JSD) across regions

### 548 A.3 Evaluation Setup

549 **CLIP Prompt Engineering** We use CLIP in a zero shot setting, where we prompt the model using  
550 the set of Dollar Street classes (e.g. *medication, plates of food*) for each image to generate predictions.  
551 We generate the text prompts for CLIP by combining the 80 prompt templates used in the original  
552 CLIP paper with each Dollar Street class name, substituting `_` for spaces. We consider an image  
553 correctly predicted if the top 5 classes predicted by CLIP is associated with the photo. *Note: Most*  
554 *photos in DollarStreet have only one label, but a small subset of (638) images containing multiple*  
555 *class labels (e.g. (cups, plates, dish racks) and (child rooms, kids bed, beds)).*

556 **ImageNet21k as a shared taxonomy** For models outside of CLIP, we use ImageNet21k to ground  
557 our models in a shared taxonomy. Following Goyal et al. [2022], we map the ImageNet21k labels  
558 to DollarStreet classes. We consider the image correctly classified if any of the top 5 ImageNet21k  
559 classes predicted by the model are mapped to any of the DollarStreet classes associated with the photo.  
560 We note that the mapping is not 1:1, and multiple classes in DollarStreet have multiple classes in  
561 ImageNet 21k that map to the single class. All of the models used for evaluation excluding CLIP and  
562 SEER are trained on ImageNet 21k. SEER is pre-trained in a self-supervised manner, and the model  
563 is fine-tuned on the 108 classes in ImageNet 21k that overlap with DollarStreet prior to evaluation.  
564 For ImageNet-21k pretraining, we use models from Ridnik et al. [2021].

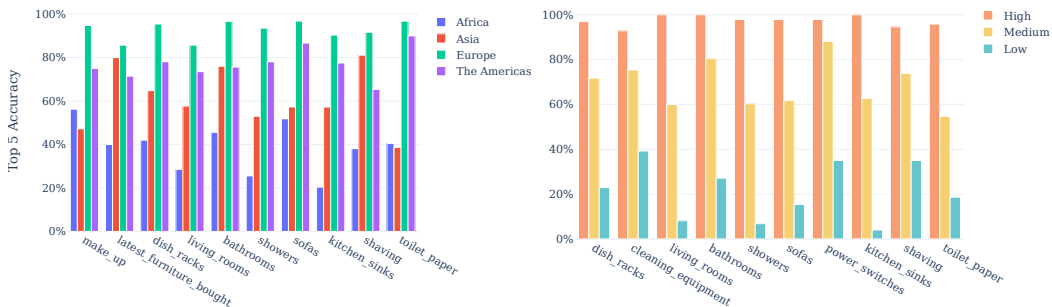

Figure 10: 10 classes with biggest performance discrepancy over regions (left) and income bucket (right).

565 **Class level performance disparities** Figure 10 shows the top 10 classes with the biggest per-  
566 formance disparity between groups for regions and incomes. We define the largest performance  
567 discrepancy as the maximum difference in accuracy between any two regions (or income buckets).  
568 At a class level, we find that the discrepancy in accuracy can be stark - over 50% for the classes with  
569 the widest gap. For both incomes and geographies, we find that the differences mostly pertain to

570 items in kitchens (*dish racks, kitchen sinks*) and items in bathrooms (*showers, shaving, toilet paper,*  
 571 *bathrooms*).

572 **A.4 Explaining model performance disparities with factor labels**

573 As part of our analysis of model performance disparities, we investigate the impact of pretraining  
 574 class balance and image quality. In Table 11, we show the Pearson correlation coefficients and  
 575 p-values between each model’s top-5 accuracy and the Image DPI, a measure of image resolution.  
 576 In Table 12, we show the Pearson correlation coefficients and p-values between each model’s top-5  
 577 accuracy and the ImageNet-21K class count. We excluded CLIP from this analysis as CLIP was  
 578 trained on a proprietary dataset.

| Model    | Correlation, Top 5 Accuracy and Image DPI |
|----------|-------------------------------------------|
| ViT      | -0.019 (p = 0.035)                        |
| ResNet50 | -0.023 (p = 0.008)                        |
| MLPMixer | -0.026 (p = 0.002)                        |
| BeIT     | -0.003 (p = 0.72)                         |
| SEER     | -0.016 (p = 0.057)                        |
| CLIP     | -0.035 (p = 0.00005)                      |

Table 11: Pearson Correlation coefficients and p-values between each model’s top-5 accuracy and image quality, as measured by DPI.

| Model    | Correlation, Top-5 Accuracy and Class Count |
|----------|---------------------------------------------|
| ViT      | 0.126 (p < 0.0001)                          |
| ResNet50 | 0.142 (p < 0.0001)                          |
| MLPMixer | 0.135 (p < 0.0001)                          |
| BeIT     | 0.222 (p < 0.0001)                          |
| SEER     | 0.103 (p < 0.0001)                          |

Table 12: Pearson Correlation coefficients and p-values between each model’s top-5 accuracy and ImageNet-21K class counts. CLIP is not included, as it was trained on a proprietary dataset.

579 Factors most associated with misclassifications differ considerably across regions and incomes. We  
 580 find for the `high` income bucket, objects marked as *smaller* are most associated with mistakes,  
 581 appearing +2.8x more among mistakes. On the other hand, *texture* which is not among the top five  
 582 factors among mistakes in the `high` income bucket is associated with mistakes in the `medium`  
 583 and `low` income buckets. *Texture* is +0.6x and +1.7x more likely to appear among mistakes in the  
 584 `medium` and `low` income buckets respectively. We also find in the `low` income bucket, factors such  
 585 as *occlusion* and *darker lighting* to be associated with model mistakes, appearing +1.2x and +0.9x  
 586 more so among mistakes in the `low` income bucket. This suggests specific factors such as *texture*,  
 587 *occlusion*, and *darker lighting* are associated with the disparity in performance we observe across  
 588 incomes.

589 **Further discussion of actors associated with mistakes across regions.** We also measured the  
 590 factors associated with model mistakes across regions in Figure 6 in Section 5.3 of the main text.  
 591 In `Asia` we observe the factors most associated with mistakes are similar to those associated with  
 592 mistakes overall. However, we find distinctive factors are associated with mistakes across each of  
 593 the other regions. In the `Americas`, we find *smaller objects* (+1.2x more likely to appear among  
 594 mistakes), followed by images with *multiple objects* (+0.3x). Similarly in `Europe`, *smaller objects*  
 595 and *multiple objects* are most associated with mistakes appearing +2.8x and +0.7x more so among  
 596 mistakes respectively. In `Africa` however, we find instead *texture* (+1.6x) most associated with  
 597 mistakes, followed by *occlusion* (+0.9x) and *darker lighting* (+0.8x). This suggests the disparity



598 due to lower performance in regions such as Africa are associated with distinct factors related to  
 599 *texture, occlusion, and darker lighting*.

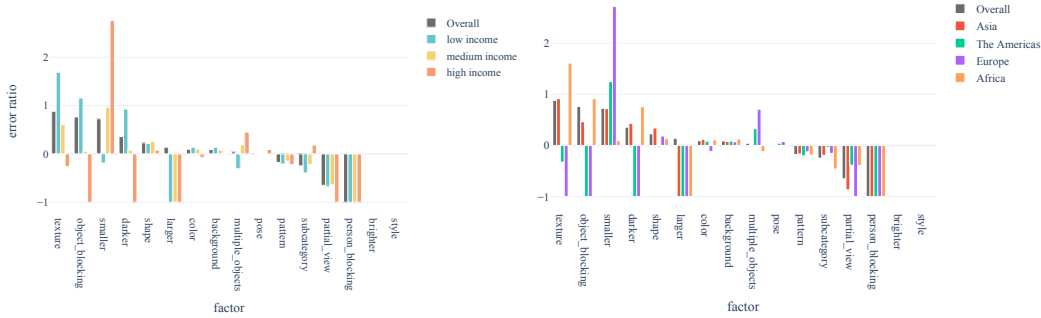

Figure 11: Shows the full error ratios for each factor per income bucket (left) and region (right). An error ratio higher than zero indicates the factor is more associated with model mistakes; less than zero indicates the factor is less likely to appear among a model’s mistakes.

600 **Statistical significance of error ratios for top factors.** To confirm the top factors associated with  
 601 model mistakes measured by our error ratio are statistically significant. We conduct a Chi-Squared  
 602 test comparing the overall distribution of counts of the top factors to their distribution of counts  
 603 among misclassifications. We find a statistically significant difference with a Chi-Squared statistic of  
 604 21.7 (p-value =0.0002).

| Class         | Income | Factors associated with mistakes                  |
|---------------|--------|---------------------------------------------------|
| sofas         | low    | pattern (+0.5x), background (+0.3x), pose (+0.2x) |
| toilet paper  | low    | texture (+3.3x), shape (+2.7x), color (+0.8x)     |
| living rooms  | low    | background (+0.8x), pose (+0.0x), color (-0.1x)   |
| kitchen sinks | low    | color (+0.5x), background (+0.3x), pose (+0.2x)   |
| showers       | low    | background (+0.9x), pose (+0.3x), pattern (-0.5x) |

Table 13: Class-specific vulnerabilities surfaced by our factor labels. We show vulnerabilities for the classes with lowest income performance. The values in parenthesis indicate how much more likely a factor is to appear for misclassified samples.

605 **Factors most associated with largest discrepancies for classes across income buckets.** We show  
 606 the three factors most associated with model mistakes for the classes across income buckets with  
 607 largest performance gap in Table 13. Trends are similar to those shown in the main paper for the  
 608 largest disparity per region.

609 **Additional analysis of vulnerabilities by country** In Table 14 we show the most vulnerable factor  
 610 by country along with its error ratio for CLIP with a ViT encoder.

611 **Additional analysis on the effect of architecture and training procedure** We extend our eval-  
 612 uation of CLIP models to include a ResNet50 encoder, to enable more consistency between the  
 613 architectures of our CLIP and supervised models. Results per income are given in 15.

#### 614 A.5 Texture debiasing experimental details

615 To measure the effect of reducing texture bias from Geirhos et al., we create a mapping from  
 616 Dollar Street classes to ImageNet-1k similar to Rojas et al. [2022]. We initialize the map-  
 617 ping by matching the embedding similarity of each class name to its nearest neighbors from  
 618 ImageNet-1k using a pre-trained Spacy language model eng-large [https://spacy.io/  
 619 usage/linguistic-features#vectors-similarity](https://spacy.io/usage/linguistic-features#vectors-similarity). We then manually correct any

| Country          | Most vulnerable factor | Error Ratio |
|------------------|------------------------|-------------|
| Bangladesh       | shape                  | 1.77        |
| Bolivia          | color                  | 0.48        |
| Brazil           | multiple_objects       | 3.25        |
| Burkina Faso     | texture                | 1.56        |
| Burundi          | color                  | 0.42        |
| Cambodia         | texture                | 0.7         |
| Cameroon         | background             | 0.23        |
| China            | smaller                | 3.52        |
| Colombia         | color                  | 0.34        |
| Egypt            | pattern                | 0.47        |
| France           | pose                   | 0.88        |
| Haiti            | shape                  | 0.26        |
| India            | texture                | 1.2         |
| Indonesia        | smaller                | 2.15        |
| Cote d'Ivoire    | texture                | 2.17        |
| Jordan           | background             | 0.29        |
| Kazakhstan       | background             | 0.82        |
| Kenya            | background             | 0.51        |
| South Korea      | shape                  | 1.71        |
| Latvia           | smaller                | 7.88        |
| Lebanon          | background             | 0.82        |
| Liberia          | color                  | 0.49        |
| Malawi           | texture                | 2.27        |
| South Africa     | color                  | 0.73        |
| Mexico           | pose                   | 0.18        |
| Myanmar          | texture                | 1.84        |
| Nepal            | texture                | 1.65        |
| Netherlands      | pose                   | 0.94        |
| Nigeria          | texture                | 1.29        |
| Pakistan         | background             | 1.05        |
| Palestine        | background             | 0.49        |
| Papua New Guinea | background             | 0.29        |
| Peru             | pose                   | 0.91        |
| Philippines      | texture                | 1.98        |
| Romania          | background             | 0.43        |
| Russia           | pose                   | 0.42        |
| Rwanda           | texture                | 3.72        |
| Somalia          | background             | 0.58        |
| Sri Lanka        | background             | 2.65        |
| Sweden           | pose                   | 0.28        |
| Thailand         | subcategory            | 0.16        |
| Tunisia          | background             | 0.4         |
| United States    | smaller                | 3.49        |
| Ukraine          | pose                   | 0.38        |
| United Kingdom   | pose                   | 0.39        |
| Vietnam          | background             | 0.3         |
| Zimbabwe         | background             | 0.55        |

Table 14: The most vulnerable factor for a CLIP ViT per country.

620 issues in this mapping to produce ImageNet-1k mappings for approximately half of the Dollar Street  
621 classes. Note for all other analysis we use the ImageNet-21k mapping from [Goyal et al. \[2022\]](#).

| Model                 | high | middle | low  |
|-----------------------|------|--------|------|
| BEiTPretrained21k     | 64.9 | 60.4   | 51.7 |
| MLPMixerPretrained21k | 88.3 | 79.9   | 61.9 |
| SeerPretrained        | 89.6 | 81.7   | 64.3 |
| ViTPretrained21k      | 88.3 | 79.9   | 61.3 |
| ResNet50Pretrained21k | 86.5 | 77.4   | 58.4 |
| CLIP ViTB/32          | 92.6 | 83.4   | 66.9 |
| CLIP ResNet101        | 91.2 | 82.9   | 68.2 |
| CLIP ResNet50         | 95.7 | 88.8   | 73.4 |

Table 15: Comparison of model architectures across incomes. Overall, we find that while architecture and learning objective are important factors for fairness considerations, there are consistent and similar vulnerabilities across models.

622 **B Data Card**

623 We provide a data card for our annotations, following the guidance of Pushkarna et al. [2022].

| <b>DollarStreet Factor Annotations</b>                                                                                                                                                                                                                                                                                                                                                                                                                                                                 |                                                                                                                                                                                                                                                                                                                                                                                                                                                                                                                                                                                                                                                                         |
|--------------------------------------------------------------------------------------------------------------------------------------------------------------------------------------------------------------------------------------------------------------------------------------------------------------------------------------------------------------------------------------------------------------------------------------------------------------------------------------------------------|-------------------------------------------------------------------------------------------------------------------------------------------------------------------------------------------------------------------------------------------------------------------------------------------------------------------------------------------------------------------------------------------------------------------------------------------------------------------------------------------------------------------------------------------------------------------------------------------------------------------------------------------------------------------------|
| <p>We provide annotations for Dollar Street images with distinctive factor labels such as pose, background, and color to explain performance disparities in models.</p> <p>Data is available at:<br/> <a href="https://github.com/facebookresearch/dollarstreet_factors">https://github.com/facebookresearch/dollarstreet_factors</a><br/>           Data visualizer is available at:<br/> <a href="https://dollarstreetfactors.metademolab.com/">https://dollarstreetfactors.metademolab.com/</a></p> |                                                                                                                                                                                                                                                                                                                                                                                                                                                                                                                                                                                                                                                                         |
| <b>Overview</b>                                                                                                                                                                                                                                                                                                                                                                                                                                                                                        |                                                                                                                                                                                                                                                                                                                                                                                                                                                                                                                                                                                                                                                                         |
| Publisher<br>Authors<br>Contact<br>Funding & Funding Type<br>License                                                                                                                                                                                                                                                                                                                                                                                                                                   | Meta<br>Laura Gustafson, Megan Richards, Melissa Hall, Caner Hazirbas,<br>Diane Bouchacourt, Mark Ibrahim<br><a href="mailto:dollarstreet-factors@meta.com">dollarstreet-factors@meta.com</a><br>Fundamental AI Research<br>CC BY-NC 4.0                                                                                                                                                                                                                                                                                                                                                                                                                                |
| <b>Applications</b>                                                                                                                                                                                                                                                                                                                                                                                                                                                                                    |                                                                                                                                                                                                                                                                                                                                                                                                                                                                                                                                                                                                                                                                         |
| Dataset Purpose<br>Key Application<br>Primary Motivations<br>Intended Audience<br>Suitable Use Case                                                                                                                                                                                                                                                                                                                                                                                                    | Evaluate computer vision models robustness to common factors to help pinpoint where geographical and economical performance discrepancies arise.<br><i>Computer Vision, Robustness, Fairness</i><br>We can use the factors to identify model vulnerabilities that contribute to these discrepancies. Pinpointing the vulnerabilities will help guide research into developing fairer models.<br>Vision researchers aiming to analyse their trained vision models.<br>Evaluation of Computer Vision models and analysis as to a model's strengths and weaknesses.                                                                                                        |
| <b>Data Type</b>                                                                                                                                                                                                                                                                                                                                                                                                                                                                                       |                                                                                                                                                                                                                                                                                                                                                                                                                                                                                                                                                                                                                                                                         |
| Primary Data Type<br>Primary Annotation Type<br>Data SnapShot<br>Data Sources                                                                                                                                                                                                                                                                                                                                                                                                                          | Annotations for existing DollarStreet dataset of images<br>Annotations are manually gathered from expert annotators. Annotations are booleans for each of the factors, along with single word and paragraph responses detailing the annotator's logic.<br>Dataset contains <ul style="list-style-type: none"> <li>• Annotations for <b>14k</b> images</li> <li>• Each image is annotated with <b>16</b> factors</li> </ul> Annotations were manually gathered. Annotations are for images from the existing public DollarStreet dataset. <a href="https://www.gapminder.org/dollar-street">https://www.gapminder.org/dollar-street</a> Images are licensed under CC-BY. |

| <b>DollarStreet Factor Annotations</b> |                                                                                                                                                                                                                                                                                                                                                                                                                                                                                                                                                                                                                                                                                                                                                                                                                                                                                                                                                                                                                                                                                                                                                                                                                                                                                                                                                                                                                                                                                                                                                                                                                                                                                                                                                                                                                                                                                                                                                                |
|----------------------------------------|----------------------------------------------------------------------------------------------------------------------------------------------------------------------------------------------------------------------------------------------------------------------------------------------------------------------------------------------------------------------------------------------------------------------------------------------------------------------------------------------------------------------------------------------------------------------------------------------------------------------------------------------------------------------------------------------------------------------------------------------------------------------------------------------------------------------------------------------------------------------------------------------------------------------------------------------------------------------------------------------------------------------------------------------------------------------------------------------------------------------------------------------------------------------------------------------------------------------------------------------------------------------------------------------------------------------------------------------------------------------------------------------------------------------------------------------------------------------------------------------------------------------------------------------------------------------------------------------------------------------------------------------------------------------------------------------------------------------------------------------------------------------------------------------------------------------------------------------------------------------------------------------------------------------------------------------------------------|
| Annotation format                      | <p>Each item in the annotation file will contain:</p> <ol style="list-style-type: none"> <li>1. Image information: <ul style="list-style-type: none"> <li>• url: Public url of image</li> <li>• full_image_id: Unique ID of image</li> <li>• household_id: Unique ID of household who took the photo</li> <li>• class: Image classification class</li> </ul> </li> <li>2. Group information: <ul style="list-style-type: none"> <li>• region: Region where the image is from. Options are <i>The Americas</i>, <i>Europe</i>, <i>Africa</i>, <i>Asia</i>. Derived from country.</li> <li>• income_bucket: Income bucket of household who took the image. Options are <i>high income</i>, <i>middle income</i>, <i>low income</i>. Derived from income</li> <li>• country: String of country name where image is taken.</li> <li>• lat: Latitude of country</li> <li>• lng: Longitude of country</li> <li>• income: Integer of income of household. TODO metric</li> </ul> </li> <li>3. Summary: <ul style="list-style-type: none"> <li>• one_word: One word describing how the image differs from the prototypical images for it's class.</li> <li>• justification: String description for the annotators' justification of their one word summary.</li> <li>• agree_right: Boolean describing whether the annotator agreed with the class label</li> <li>• why_disagree: If agree_right is False this will contain a string explanation as to why the annotator disagreed with the class label</li> </ul> </li> <li>4. Factors (Boolean): <ul style="list-style-type: none"> <li>• multiple_objects</li> <li>• background</li> <li>• color</li> <li>• brighter</li> <li>• darker</li> <li>• style</li> <li>• larger</li> <li>• smaller</li> <li>• object_blocking</li> <li>• person_blocking</li> <li>• partial_view</li> <li>• pattern</li> <li>• pose</li> <li>• shape</li> <li>• subcategory</li> <li>• location</li> <li>• texture</li> </ul> </li> </ol> |

624 **B.1 Interactive factor dashboard**

625 We show screenshots of our interactive dashboard for exploring the factor labels across regions in  
626 Figures 12 and 13. The dashboard allows for interactive queries by region, income, factor label. Each  
627 query yields sample images, which you can interactively explore annotations for as shown in 13. We  
628 hope this tool will allow researchers to easily explore factor labels associated with images across axes  
629 such as regions or incomes to spur further research into reliable vision systems.

Figure 12: Interactive dashboard for Dollar Street factor annotations with an income and factor label query (for texture).

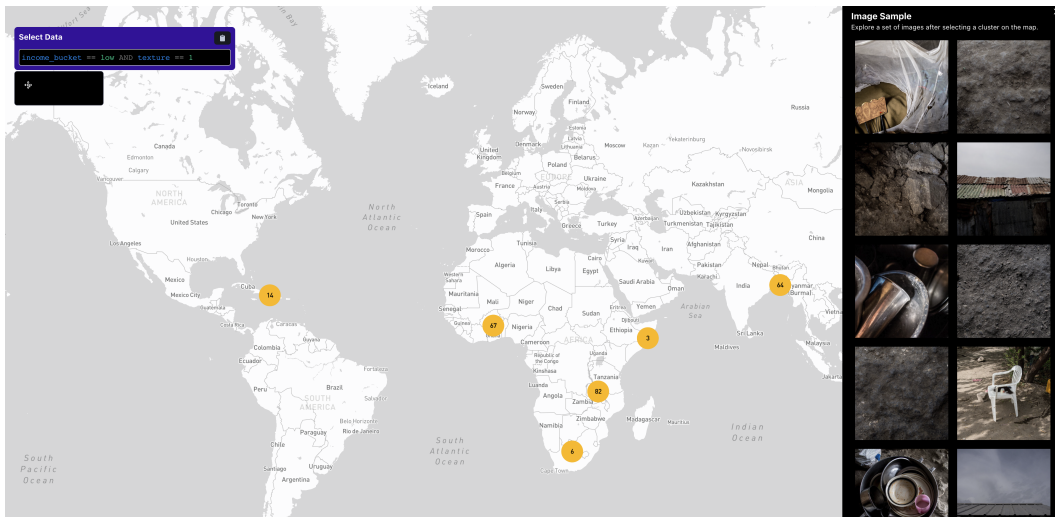

Figure 13: Interactive dashboard for Dollar Street factor annotations illustrating an example of the annotations.

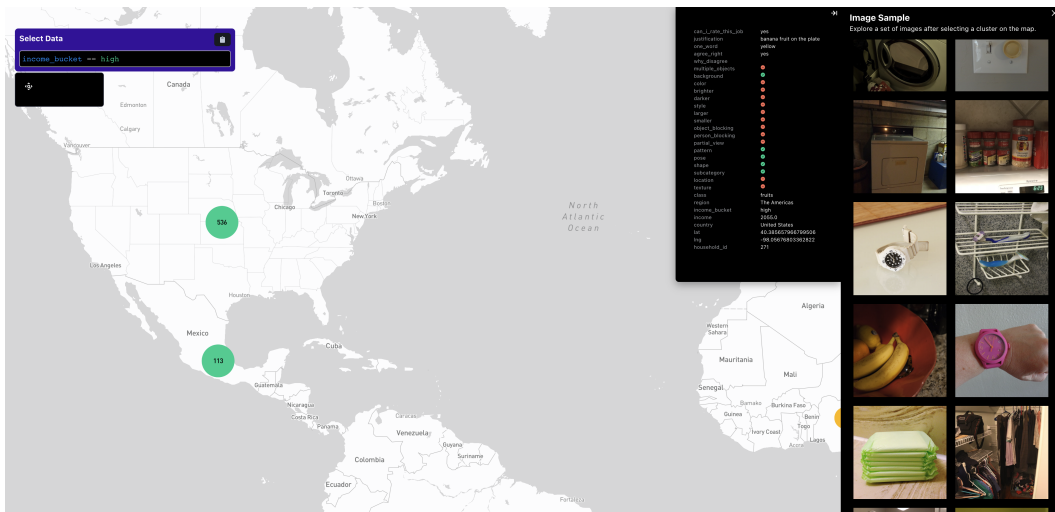

630 **B.2 Sample images**

| Country      |                                                                                   |                                                                                   |                                                                                    |                                                                                     |
|--------------|-----------------------------------------------------------------------------------|-----------------------------------------------------------------------------------|------------------------------------------------------------------------------------|-------------------------------------------------------------------------------------|
| The Americas |  |  |  |  |
| Africa       |  |  |  |  |

Table 17: Examples of diaper images. Our factors surfaced that images of diapers in Dollar Street between regions differed most among *pose, color, partial view*.

631

| Country |                                                                                     |                                                                                     |                                                                                     |                                                                                      |
|---------|-------------------------------------------------------------------------------------|-------------------------------------------------------------------------------------|-------------------------------------------------------------------------------------|--------------------------------------------------------------------------------------|
| Asia    |   |   |   |   |
| Africa  |  |  |  |  |

Table 18: Examples of goat images. Our factors surfaced that images of goats in Dollar Street between regions differed most among *pattern, color, subcategory*

632

633 In Tables 18 and 17 we show example images from classes and regions that were found to have some  
 634 the starkest difference in factors, as measured by JSD.
